# Supplementary material for: High-energy organic group-induced spectrally pure upconversion emission in novel zirconate-/hafnate-based nanocrystals
Source: Royal Society of Chemistry journal article supplement (doi:10.1039/c5ce01195g), 2015-01-01
Supplement: c5ce01195g1.pdf [file c5ce01195g1.pdf]

## Supporting Information

### High-Energy Organic Groups Induced Spectrally Pure Upconversion Emission for Zirconate-/hafnate-Containing Nanocrystals

Xianghong He,<sup>†, ‡</sup> Bing Yan<sup>\*, †</sup>

<sup>†</sup>Department of Chemistry, Tongji University, Shanghai, 200092, China

<sup>‡</sup>School of Chemistry and Environmental Engineering, Jiangsu University of Technology,  
Changzhou, 213001, China

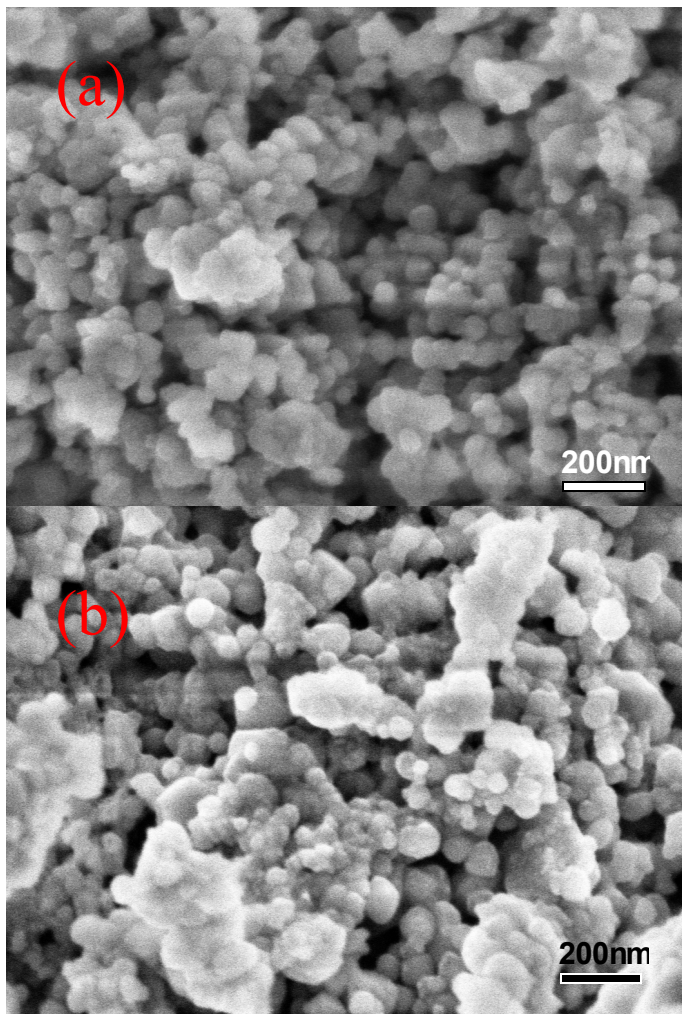

Figure S1 SEM images of as-obtained  $K_3ZrF_7$  (a) and  $K_3HfF_7$  (b) NCs.

## Phase and compositional analyses of Yb<sup>3+</sup>/Er<sup>3+</sup>-codoped K<sub>3</sub>(Zr,Hf)F<sub>7</sub> nanophosphors

XRD results of K<sub>3</sub>ZrF<sub>7</sub>:Yb<sup>3+</sup>,Er<sup>3+</sup> samples with different concentrations of Yb<sup>3+</sup> and/or Er<sup>3+</sup> (panel a of Figure S2, and Figure S3) verify that the cubic K<sub>3</sub>ZrF<sub>7</sub> structure is retained even as Yb<sup>3+</sup> doping content reaches as high as 40 mol%. Compositional analyses of K<sub>3</sub>ZrF<sub>7</sub>:Yb<sup>3+</sup>,Er<sup>3+</sup>( $x/2$  mol%,  $5 \text{ mol}\% \leq x \leq 40 \text{ mol}\%$ ) and K<sub>3</sub>(Zr<sub>0.78-t</sub>Hf<sub>t</sub>)F<sub>7</sub>:Yb<sup>3+</sup>,Er<sup>3+</sup>( $20/2$  mol%,  $0.28 \leq t \leq 0.78$ ) samples using energy dispersive X-ray spectroscopy (EDS) (Figures S4 and S5) confirm that the chemical signatures taken within different parts of the sample are identical within experimental accuracy and that the as-obtained samples contain K, Zr/Hf, F, Yb, and Er elements. In addition, the actual atomic ratios of these elements were consistent with the designed nominal stoichiometry in each case. With increasing of Yb<sup>3+</sup> doping level, the diffraction peaks shifted gradually towards the low-angle direction (panel b of Figure S2), which can be attributed to the substitution of Zr<sup>4+</sup> with an ionic radius of 0.78 Å by Yb<sup>3+</sup> with a larger ionic radius of 0.93 Å under seven F<sup>-</sup> coordination environment.<sup>[S01]</sup> Figure S6 revealed the XRD patterns K<sub>3</sub>(Zr<sub>0.78-t</sub>Hf<sub>t</sub>)F<sub>7</sub>:Yb<sup>3+</sup>,Er<sup>3+</sup>( $20/2$  mol%) samples. Since Hf<sup>4+</sup> and Zr<sup>4+</sup> own close ionic radii (0.76 and 0.78 Å for Hf<sup>4+</sup> and Zr<sup>4+</sup>, respectively), the products also remained single phase in the case of various contents of Hf<sup>4+</sup>.

Ref. [S01] D. Q. Chen, L. Lei, R. Zhang, A. P. Yang, J. Xu and Y. S. Wang, Intrinsic single-band upconversion emission in colloidal Yb/Er(Tm):Na<sub>3</sub>Zr(Hf)F<sub>7</sub> nanocrystals, Chem. Commun., 2012, 48, 10630–10632.

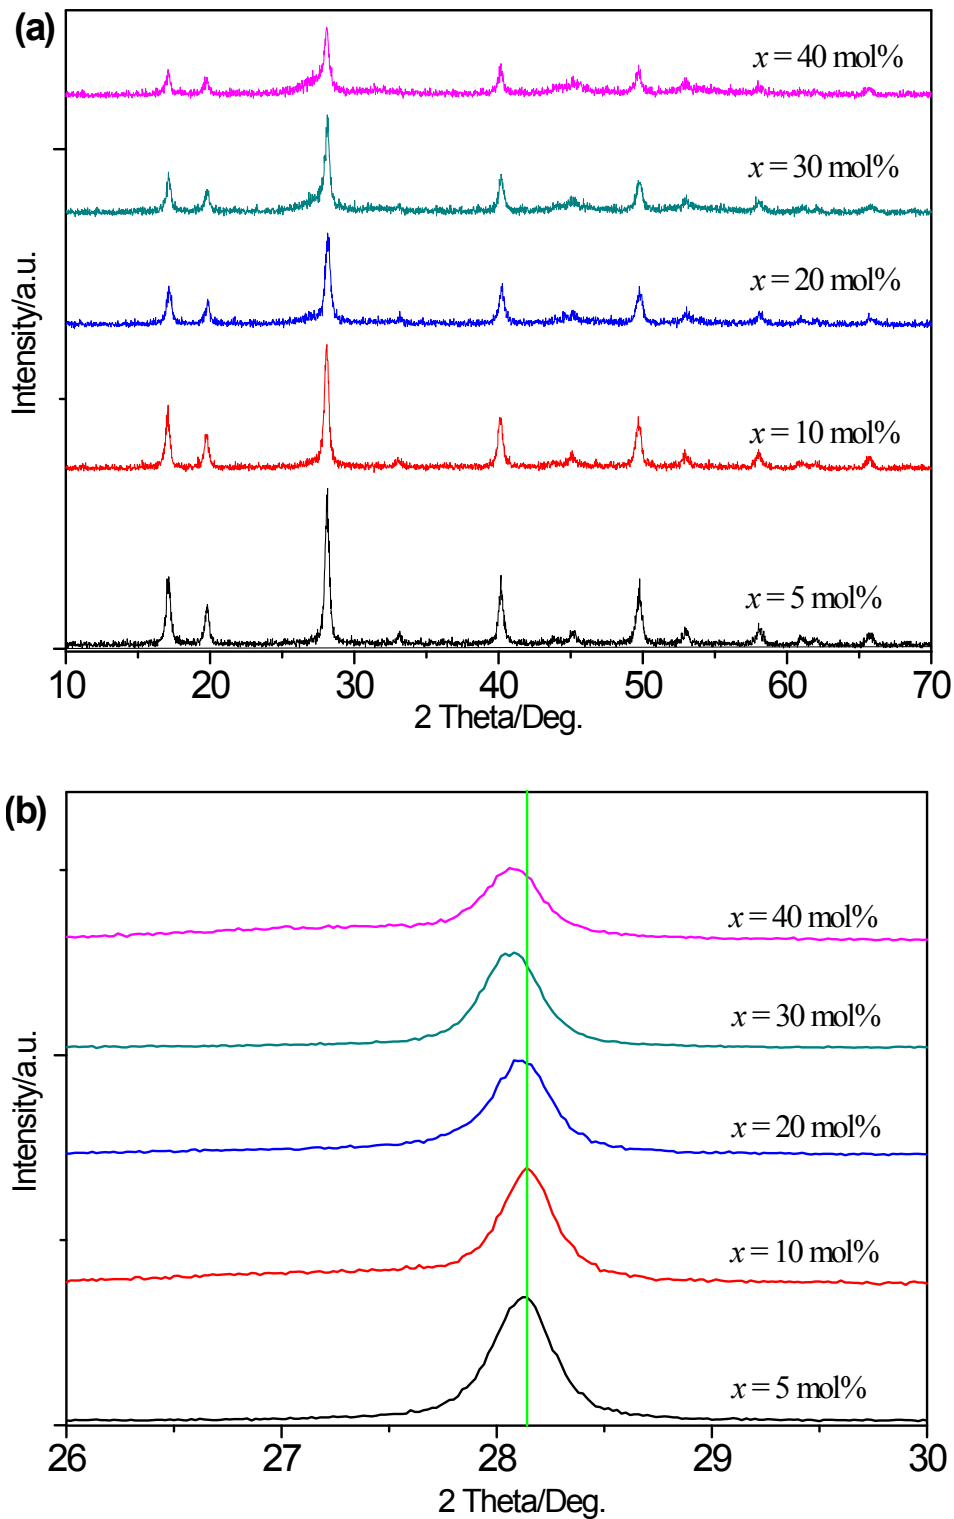

Figure S2 (a) XRD patterns in the  $2\theta$  range from  $10^\circ$  to  $70^\circ$ , and (b) XRD patterns in the  $2\theta$  range from  $26^\circ$  to  $30^\circ$  of  $\text{K}_3\text{ZrF}_7:\text{Yb}^{3+},\text{Er}^{3+}(x/2 \text{ mol}\%)$  samples with different concentrations of  $\text{Yb}^{3+}$  ( $x$  value).

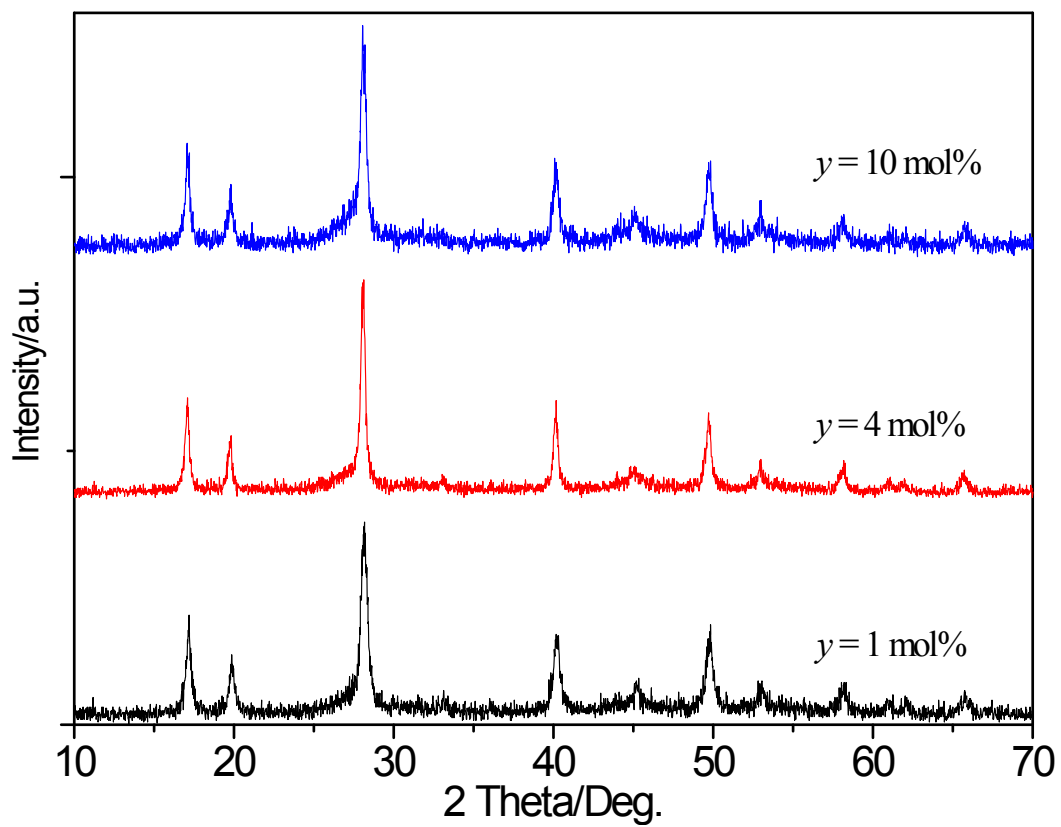

Figure S3 XRD patterns of  $\text{K}_3\text{ZrF}_7:\text{Yb}^{3+},\text{Er}^{3+}(20/y \text{ mol}\%)$  samples with different doping contents of  $\text{Er}^{3+}$  ( $y$  value).

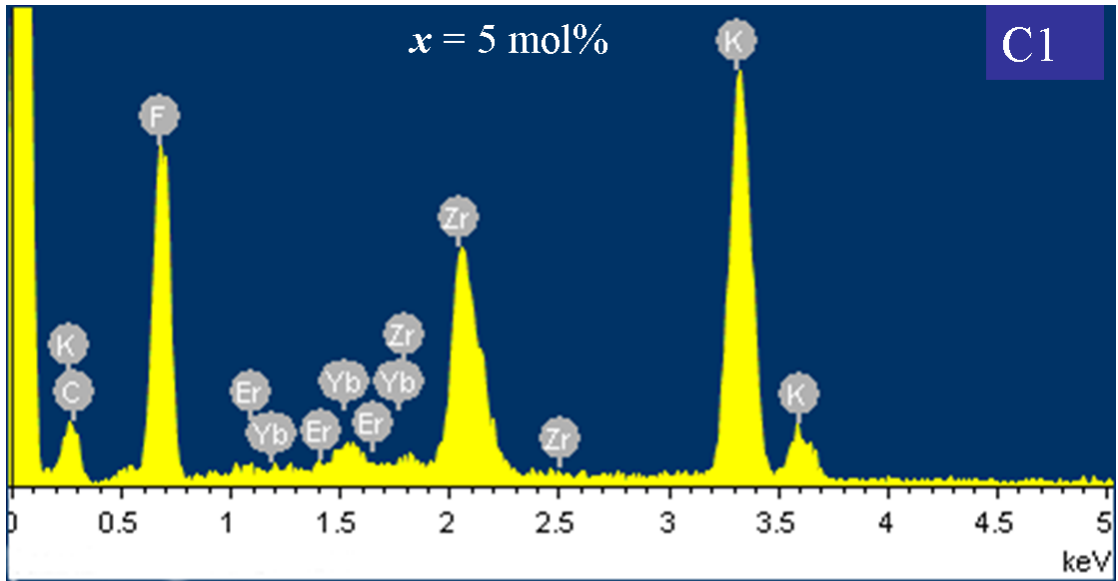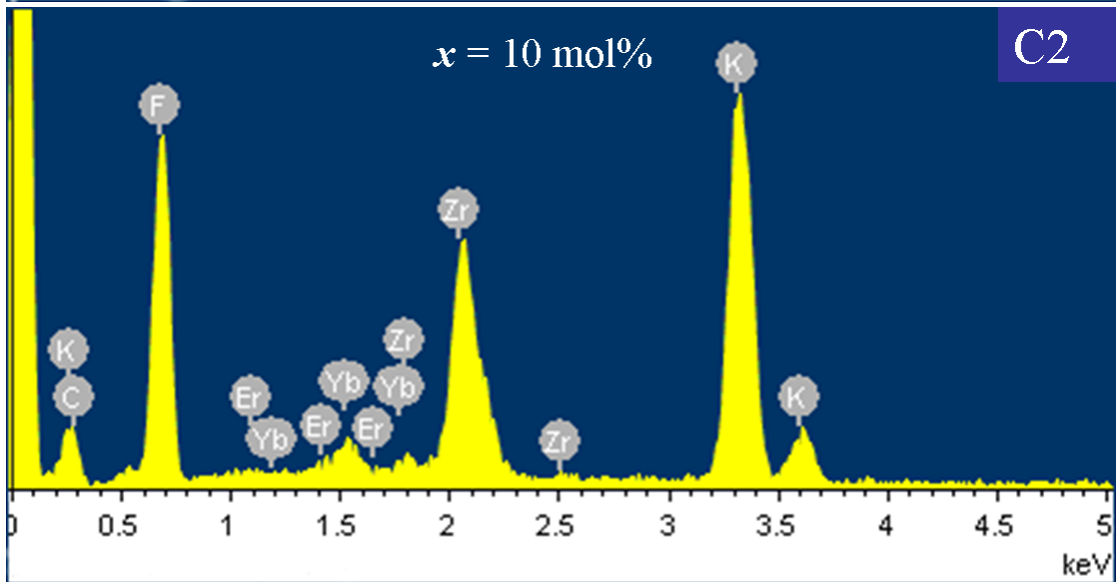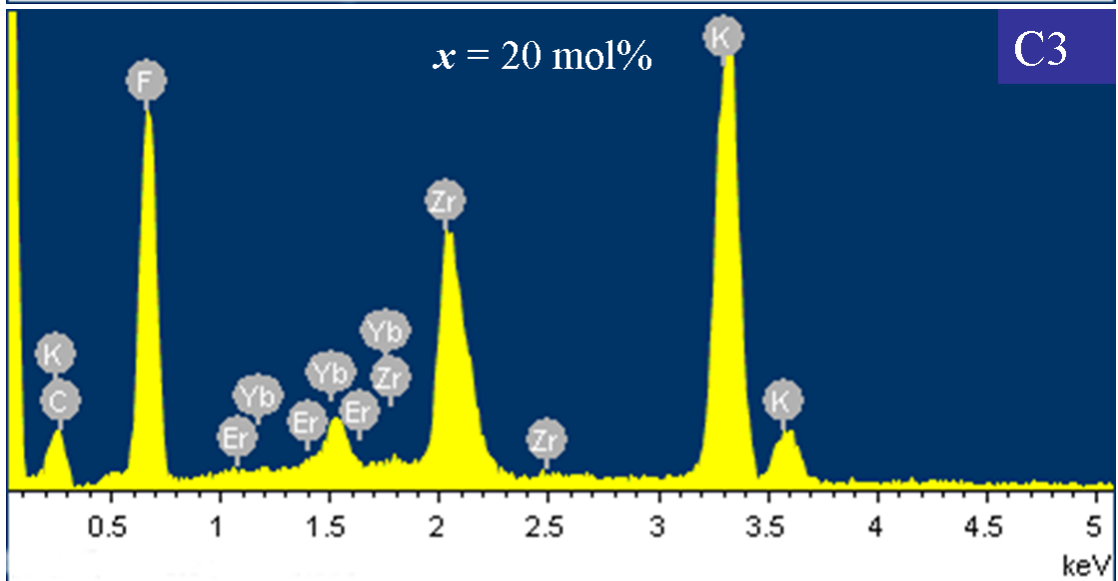

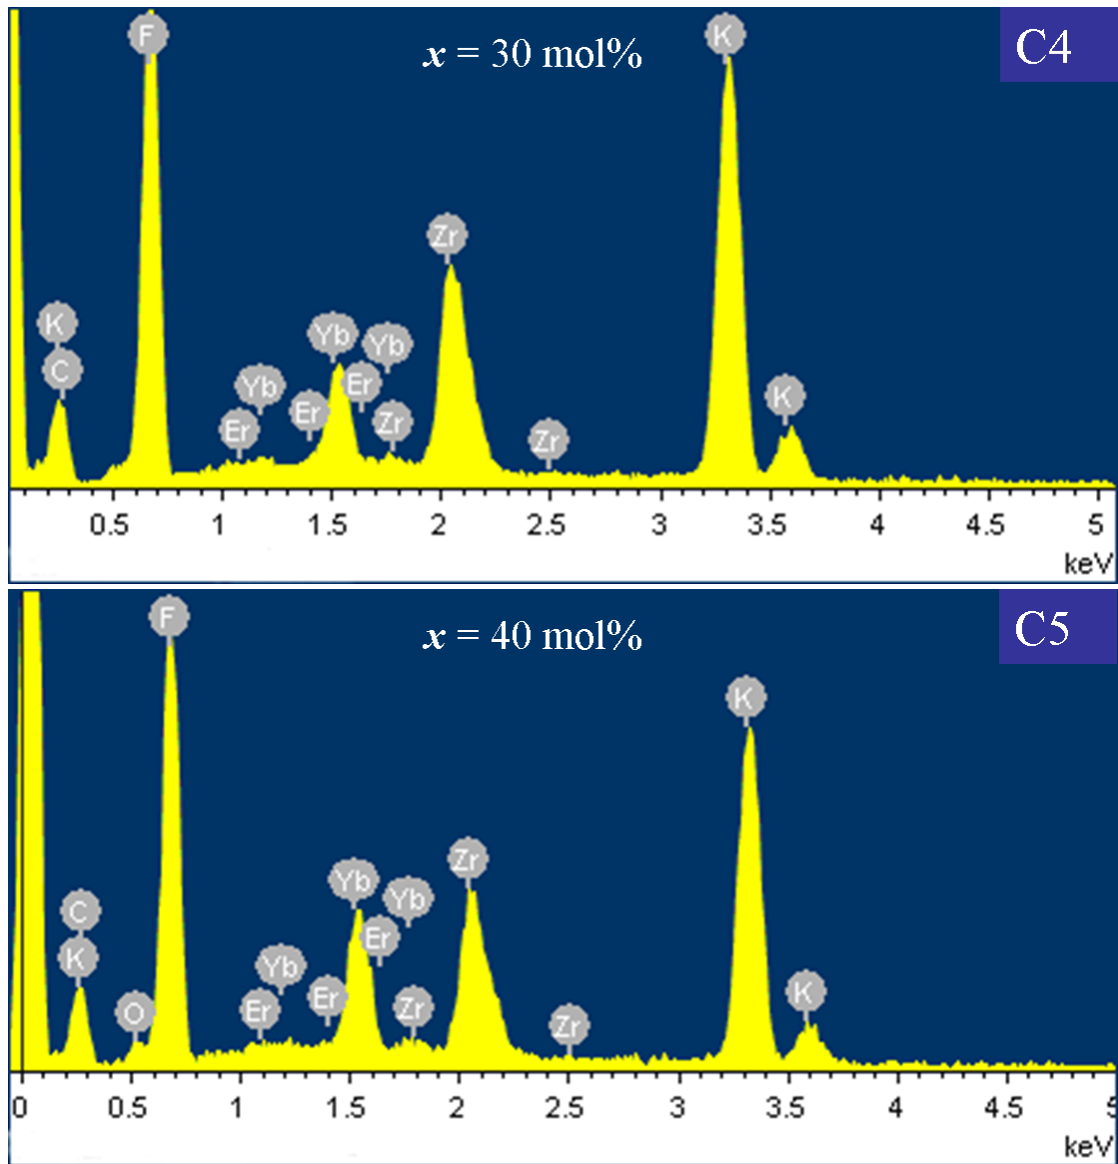

Figure S4 EDS patterns of  $K_3ZrF_7:Yb^{3+},Er^{3+}(x/2 \text{ mol}\%)$  samples with different concentrations of  $Yb^{3+}$  (x value).

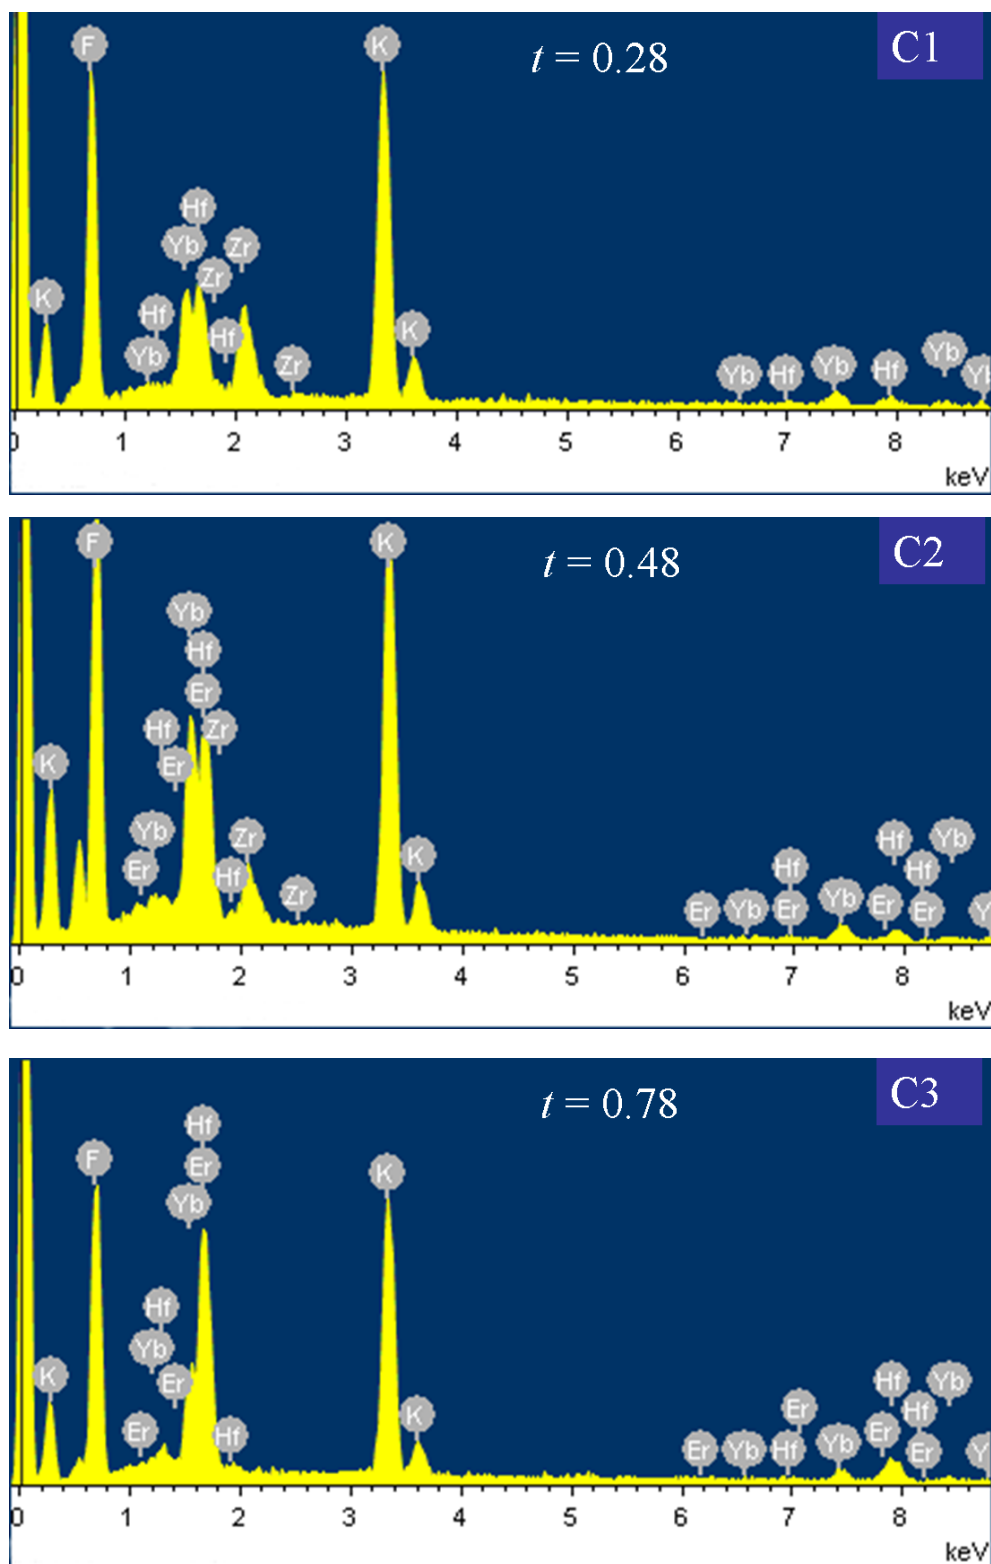

Figure S5 EDS patterns of  $K_3(Zr_{0.78-t}Hf_t)F_7:Yb^{3+},Er^{3+}(20/2 \text{ mol}\%)$  samples with various contents of  $Hf^{4+}$  ( $t$  value).



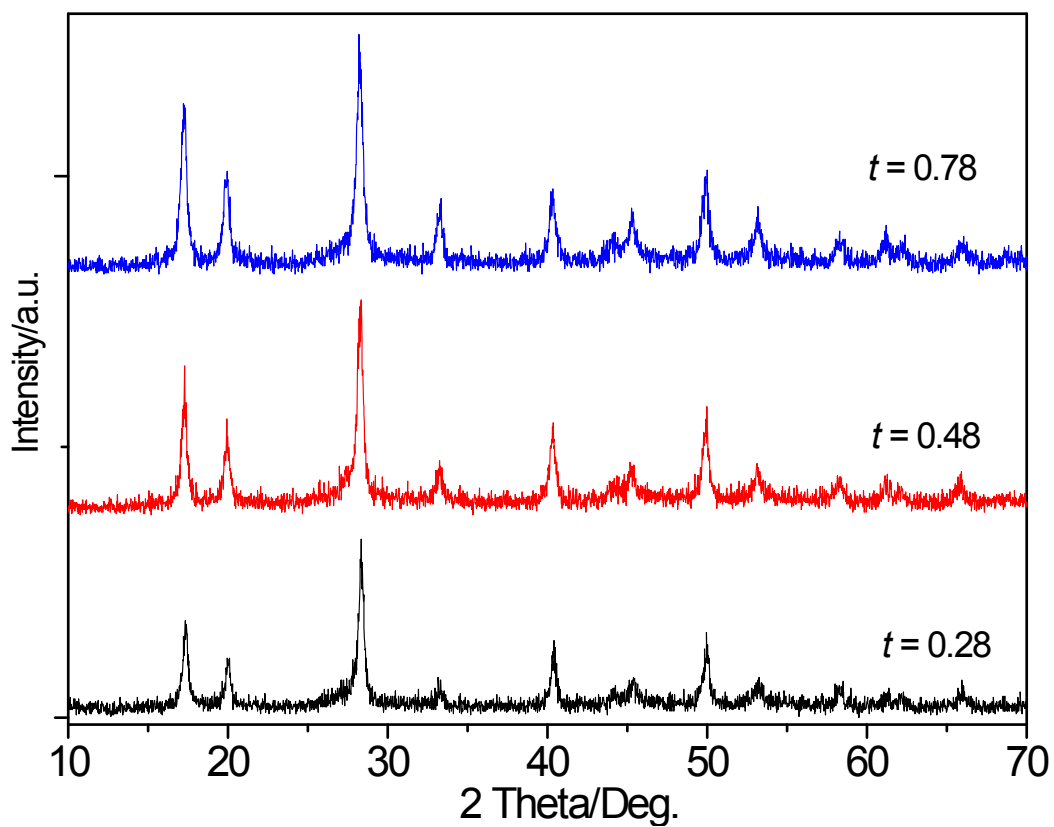

Figure S6 XRD patterns of  $\text{K}_3(\text{Zr}_{0.78-t}\text{Hf}_t)\text{F}_7:\text{Yb}^{3+},\text{Er}^{3+}$  (20/2 mol%) samples with various contents of  $\text{Hf}^{4+}$  ( $t$  value).

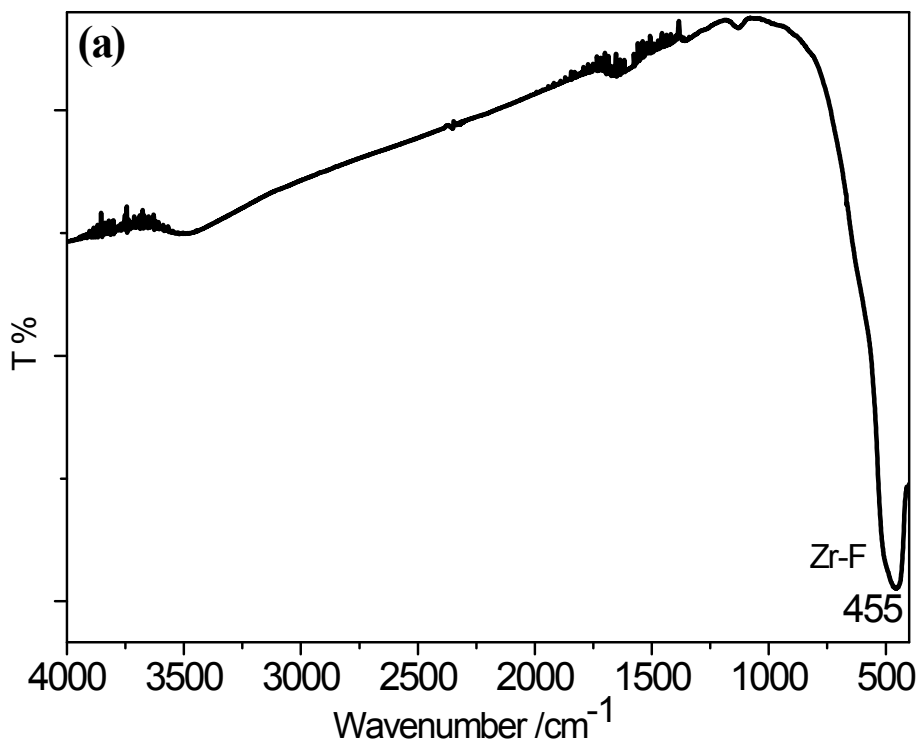

Figure S7 FT-IR spectrum of  $K_3ZrF_7:Yb^{3+},Er^{3+}(20/2 \text{ mol}\%)$  sample annealed at 350 °C.

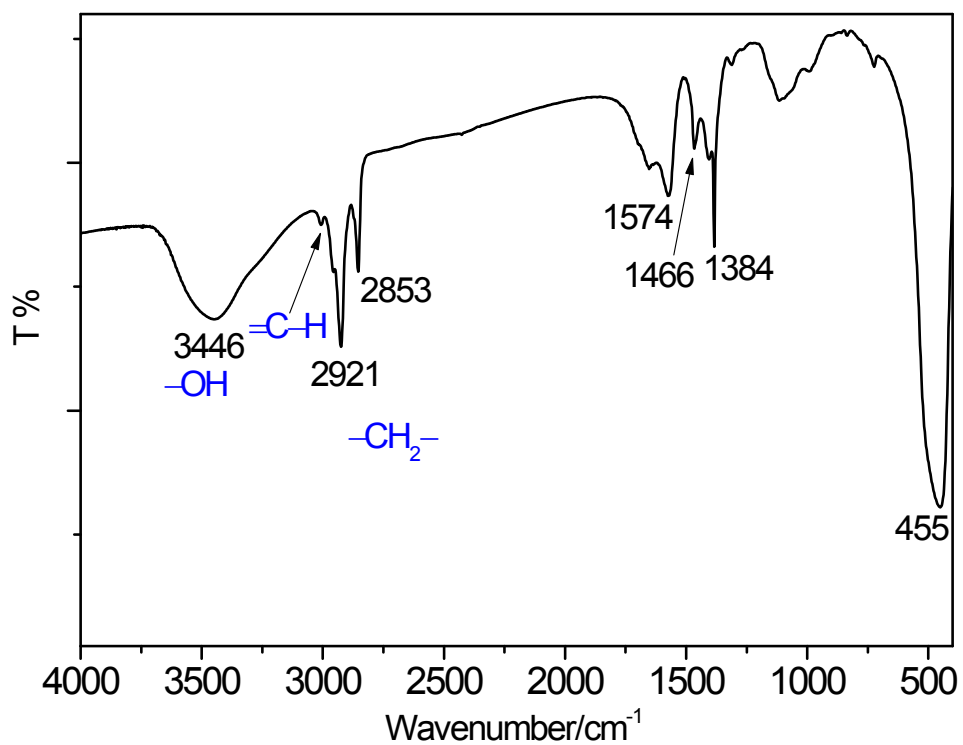

Figure S8 FT-IR spectrum of  $K_3ZrF_7:Yb^{3+},Er^{3+}$  NCs.
